# Supplementary material
Source: ML conference proceedings conference paper supplement (https://openaccess.thecvf.com/content/CVPR2023/html/Hou_Mask3D_Pre-Training_2D_CVPR_2023_paper.html)
Supplement: Supplementary file 2 [file Hou_Mask3D_Pre-Training_2D_CVPR_2023_supplemental.zip]

Archive with 4 entries (4 files):
- mask3d_supp.pdf
- __MACOSX/._mask3d_supp.pdf
- mask3d_video.mp4
- __MACOSX/._mask3d_video.mp4
